# Supplementary material for: Effects of Premature Ventricular Complex Burden on Left Ventricular Global Longitudinal Strain in Patients without Structural Heart Disease
Source: MDPI journal article supplement (doi:10.3390/jcm13061796), 2024-03-20
Supplement: s1 [file s1]

**Table S1:** Baseline Biochemical Characteristics of Patients in The Groups

|                                                   | <b>GROUP 1<br/>N:54</b> | <b>GROUP 2<br/>N:33</b> | <b>GROUP 3<br/>N:35</b> | <b>P value</b> |
|---------------------------------------------------|-------------------------|-------------------------|-------------------------|----------------|
| <b>Haemoglobin (mg/dL)</b>                        | 13.9 ± 1.4              | 14.2 ± 1.5              | 14.2 ± 1.6              | 0.400          |
| <b>HCT (%)</b>                                    | 40.1 ± 3.8              | 40.8 ± 3.7              | 41.4 ± 4.2              | 0.316          |
| <b>Leukocytes (/mm<sup>3</sup>)</b>               | 7424.8 ± 1118.9         | 7103.0 ± 1689.7         | 6994.3 ± 1782.5         | 0.481          |
| <b>Platelets (x10<sup>3</sup>/mm<sup>3</sup>)</b> | 255.6 ± 54.1            | 231.6 ± 59.6            | 264.5 ± 74.6            | 0.079          |
| <b>LDL cholesterol (mg/dl)</b>                    | 124.4 ± 30.4            | 127.3 ± 27.4            | 130.9 ± 38.3            | 0.641          |
| <b>HDL cholesterol (mg/dl)</b>                    | 54.2 ± 10.8             | 52.6 ± 11.6             | 50.9 ± 13.4             | 0.423          |
| <b>Glucose (mg/dL)</b>                            | 93 ± 18                 | 91 ± 20                 | 92 ± 22                 | 0.662          |
| <b>HbA1c (%)</b>                                  | 5.8 ± 0.9               | 5.8 ± 0.8               | 5.9 ± 1.1               | 0.678          |
| <b>TSH (mIU/L)</b>                                | 2.4 ± 1.3               | 2.6 ± 1.9               | 2.5 ± 1.8               | 0.924          |
| <b>fT4 (ng/dl)</b>                                | 1.1 ± 0.2               | 1.3 ± 0.6               | 1.2 ± 0.2               | 0.742          |
| <b>BUN (md/dL)</b>                                | 12.3 ± 3.7              | 12.4 ± 2.8              | 12.9 ± 4.1              | 0.757          |
| <b>Kreatinine (mg/dL)</b>                         | 0.8 ± 0.16              | 0.8 ± 0.1               | 0.8 ± 0.2               | 0.491          |
| <b>Sodium (mmol/L)</b>                            | 141.7 ± 2.5             | 142.1 ± 2.4             | 141.8 ± 2.5             | 0.865          |
| <b>Potasium (mmol/L)</b>                          | 4.6 ± 0.4               | 4.6 ± 0.4               | 4.7 ± 0.4               | 0.221          |

BUN: blood urea nitrogen, fT4: free thyroxine four, HbA1c: hemoglobin A1c, HCT: hematocrit, HDL: high-density lipoprotein, LDL: low-density lipoprotein, TSH: thyroid stimulating hormone.

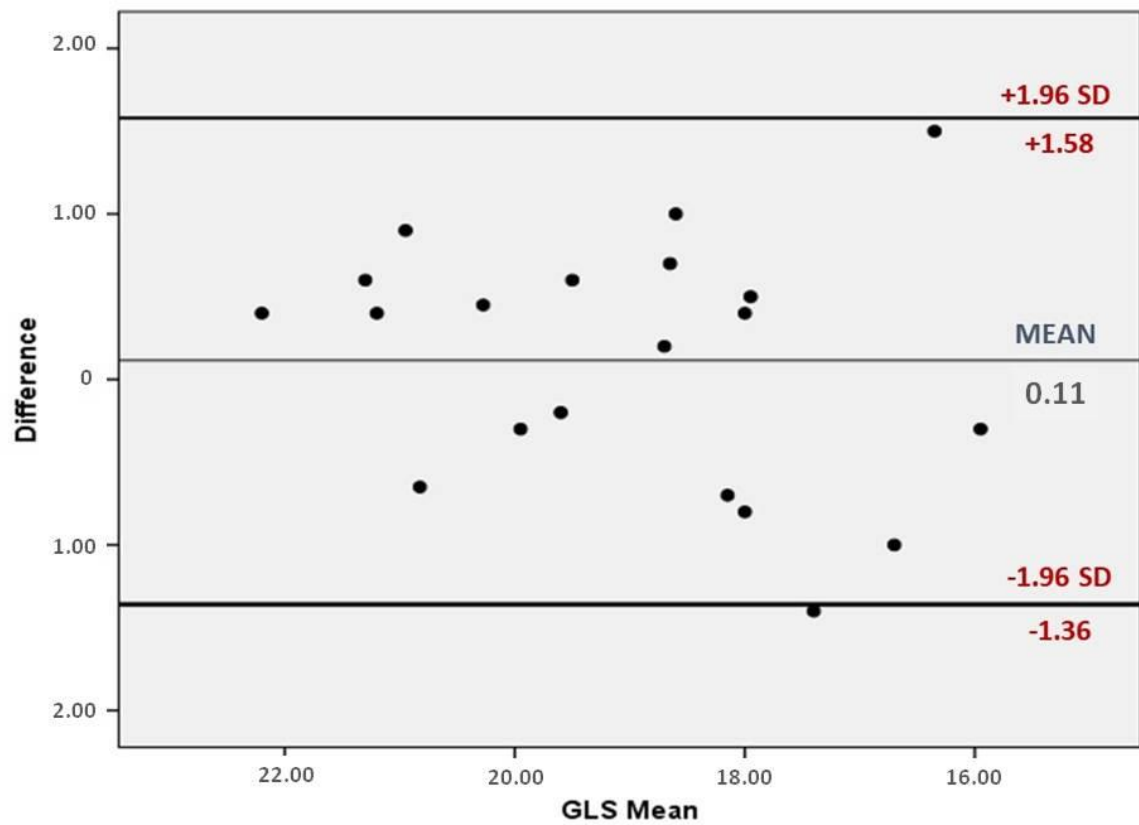

**Figure S1.** The Blant–Altman Analysis.
